# Supplementary material
Source: publisher site journal article supplement (https://www.spandidos-publications.com/5621/downloadSupplementary)
Supplement: Supplementary file 1 [file downloadSupplementary]

## Sheet: Up KEGG
Table SIII. SO versus NSL Kyoto's Encyclopedia of Genes and Genomes.
Category	Term	Count	RT	Count	LT	PH	PT	%	P-Value	Fold Enrichment	Bonferroni	Benjamini	FDR	Fisher Exact
KEGG_PATHWAY	Lysosome	38	RT	38	459	135	8998	4.6	6.2e-18	5.5	1.9e-15	1.9e-15	1.6e-15	8.5e-19
KEGG_PATHWAY	Phagosome	38	RT	38	459	182	8998	4.6	2.2e-13	4.1	7e-11	3.5e-11	2.9e-11	4.5e-14
KEGG_PATHWAY	Antigen processing and presentation	24	RT	24	459	90	8998	2.9	6.9e-11	5.2	2.2e-08	7.2e-09	6e-09	1e-11
KEGG_PATHWAY	Neutrophil extracellular trap formation	35	RT	35	459	208	8998	4.2	1.1e-09	3.3	3.5e-07	8.6e-08	7.2e-08	2.9e-10
KEGG_PATHWAY	Tuberculosis	32	RT	32	459	180	8998	3.9	1.7e-09	3.5	5.2e-07	1e-07	8.7e-08	4.1e-10
KEGG_PATHWAY	Leishmaniasis	19	RT	19	459	70	8998	2.3	7.5e-09	5.3	2.4e-06	3.9e-07	3.3e-07	1.1e-09
KEGG_PATHWAY	Metabolic pathways	127	RT	127	459	1620	8998	15.4	1.7e-07	1.5	5.2e-05	7.5e-06	6.3e-06	1e-07
KEGG_PATHWAY	Osteoclast differentiation	23	RT	23	459	128	8998	2.8	4.2e-07	3.5	0.00013	1.7e-05	1.4e-05	1e-07
KEGG_PATHWAY	Rheumatoid arthritis	18	RT	18	459	87	8998	2.2	1.4e-06	4.1	0.00044	4.9e-05	4.1e-05	2.9e-07
KEGG_PATHWAY	Fc gamma R-mediated phagocytosis	18	RT	18	459	93	8998	2.2	3.7e-06	3.8	0.0012	0.00012	9.7e-05	8.2e-07
KEGG_PATHWAY	Epstein-Barr virus infection	29	RT	29	459	231	8998	3.5	1.6e-05	2.5	0.005	0.00046	0.00038	5.9e-06
KEGG_PATHWAY	Glycosaminoglycan degradation	8	RT	8	459	21	8998	1	5.3e-05	7.5	0.016	0.0014	0.0012	4.9e-06
KEGG_PATHWAY	Protein processing in endoplasmic reticulum	23	RT	23	459	172	8998	2.8	5.8e-05	2.6	0.018	0.0014	0.0012	2e-05
KEGG_PATHWAY	NOD-like receptor signaling pathway	26	RT	26	459	213	8998	3.2	7.8e-05	2.4	0.024	0.0018	0.0015	3e-05
KEGG_PATHWAY	Carbon metabolism	18	RT	18	459	121	8998	2.2	0.00013	2.9	0.039	0.0026	0.0022	3.8e-05
KEGG_PATHWAY	Yersinia infection	19	RT	19	459	135	8998	2.3	0.00016	2.8	0.049	0.0031	0.0026	5.1e-05
KEGG_PATHWAY	Asthma	8	RT	8	459	25	8998	1	0.00018	6.3	0.056	0.0034	0.0028	2.2e-05
KEGG_PATHWAY	Collecting duct acid secretion	8	RT	8	459	27	8998	1	0.00031	5.8	0.093	0.0054	0.0045	4.1e-05
KEGG_PATHWAY	Sphingolipid metabolism	11	RT	11	459	54	8998	1.3	0.00034	4	0.1	0.0056	0.0047	7e-05
KEGG_PATHWAY	C-type lectin receptor signaling pathway	16	RT	16	459	112	8998	1.9	0.00052	2.8	0.15	0.0082	0.0068	0.00017
KEGG_PATHWAY	Systemic lupus erythematosus	19	RT	19	459	149	8998	2.3	0.00054	2.5	0.16	0.0082	0.0068	0.0002
KEGG_PATHWAY	Natural killer cell mediated cytotoxicity	16	RT	16	459	115	8998	1.9	0.0007	2.7	0.2	0.01	0.0083	0.00023
KEGG_PATHWAY	Amino sugar and nucleotide sugar metabolism	10	RT	10	459	51	8998	1.2	0.00095	3.8	0.26	0.013	0.011	0.00021
KEGG_PATHWAY	Salmonella infection	26	RT	26	459	253	8998	3.2	0.0011	2	0.29	0.014	0.012	0.0005
KEGG_PATHWAY	Influenza A	20	RT	20	459	173	8998	2.4	0.0012	2.3	0.33	0.016	0.013	0.0005
KEGG_PATHWAY	Toxoplasmosis	15	RT	15	459	110	8998	1.8	0.0013	2.7	0.34	0.016	0.013	0.00044
KEGG_PATHWAY	Starch and sucrose metabolism	8	RT	8	459	34	8998	1	0.0014	4.6	0.35	0.016	0.013	0.00024
KEGG_PATHWAY	Viral myocarditis	13	RT	13	459	88	8998	1.6	0.0016	2.9	0.39	0.017	0.015	0.00048
KEGG_PATHWAY	DNA replication	8	RT	8	459	35	8998	1	0.0016	4.5	0.4	0.017	0.015	0.0003
KEGG_PATHWAY	Other glycan degradation	6	RT	6	459	18	8998	0.7	0.0016	6.5	0.41	0.017	0.015	0.00019
KEGG_PATHWAY	HIF-1 signaling pathway	15	RT	15	459	114	8998	1.8	0.0019	2.6	0.45	0.019	0.016	0.00065
KEGG_PATHWAY	Glycolysis / Gluconeogenesis	11	RT	11	459	67	8998	1.3	0.0019	3.2	0.46	0.019	0.016	0.00052
KEGG_PATHWAY	Proteasome	9	RT	9	459	47	8998	1.1	0.0023	3.8	0.52	0.022	0.018	0.00052
KEGG_PATHWAY	B cell receptor signaling pathway	12	RT	12	459	81	8998	1.5	0.0025	2.9	0.55	0.023	0.02	0.00077
KEGG_PATHWAY	Nucleotide metabolism	12	RT	12	459	84	8998	1.5	0.0034	2.8	0.66	0.03	0.026	0.0011
KEGG_PATHWAY	Necroptosis	19	RT	19	459	176	8998	2.3	0.0036	2.1	0.68	0.031	0.026	0.0016
KEGG_PATHWAY	Ferroptosis	8	RT	8	459	40	8998	1	0.0037	3.9	0.68	0.031	0.026	0.00078
KEGG_PATHWAY	Human T-cell leukemia virus 1 infection	24	RT	24	459	250	8998	2.9	0.0042	1.9	0.74	0.035	0.029	0.0021
KEGG_PATHWAY	Galactose metabolism	7	RT	7	459	32	8998	0.8	0.0049	4.3	0.79	0.04	0.033	0.00095
KEGG_PATHWAY	Human immunodeficiency virus 1 infection	23	RT	23	459	240	8998	2.8	0.0053	1.9	0.81	0.041	0.034	0.0026
KEGG_PATHWAY	Diabetic cardiomyopathy	21	RT	21	459	211	8998	2.5	0.0053	2	0.82	0.041	0.034	0.0025
KEGG_PATHWAY	Pentose phosphate pathway	7	RT	7	459	33	8998	0.8	0.0058	4.2	0.84	0.043	0.036	0.0012
KEGG_PATHWAY	Biosynthesis of amino acids	11	RT	11	459	79	8998	1.3	0.0065	2.7	0.87	0.048	0.04	0.0021
KEGG_PATHWAY	Leukocyte transendothelial migration	14	RT	14	459	118	8998	1.7	0.0068	2.3	0.89	0.049	0.041	0.0026
KEGG_PATHWAY	Spliceosome	15	RT	15	459	134	8998	1.8	0.0081	2.2	0.92	0.057	0.048	0.0033
KEGG_PATHWAY	Cell adhesion molecules	18	RT	18	459	182	8998	2.2	0.011	1.9	0.97	0.077	0.065	0.0053
KEGG_PATHWAY	Th1 and Th2 cell differentiation	11	RT	11	459	88	8998	1.3	0.014	2.5	0.99	0.091	0.076	0.0049
KEGG_PATHWAY	Protein export	6	RT	6	459	29	8998	0.7	0.014	4.1	0.99	0.094	0.079	0.003
KEGG_PATHWAY	Bacterial invasion of epithelial cells	10	RT	10	459	76	8998	1.2	0.015	2.6	0.99	0.094	0.079	0.005
KEGG_PATHWAY	Synaptic vesicle cycle	10	RT	10	459	77	8998	1.2	0.016	2.5	0.99	0.1	0.083	0.0055
KEGG_PATHWAY	Th17 cell differentiation	12	RT	12	459	105	8998	1.5	0.018	2.2	1	0.11	0.089	0.007
KEGG_PATHWAY	NF-kappa B signaling pathway	12	RT	12	459	105	8998	1.5	0.018	2.2	1	0.11	0.089	0.007
KEGG_PATHWAY	Fc epsilon RI signaling pathway	9	RT	9	459	66	8998	1.1	0.018	2.7	1	0.11	0.09	0.006
KEGG_PATHWAY	Chemokine signaling pathway	18	RT	18	459	192	8998	2.2	0.018	1.8	1	0.11	0.09	0.0091
KEGG_PATHWAY	Intestinal immune network for IgA production	7	RT	7	459	43	8998	0.8	0.021	3.2	1	0.12	0.099	0.0056
KEGG_PATHWAY	Pyrimidine metabolism	8	RT	8	459	56	8998	1	0.023	2.8	1	0.13	0.11	0.0071
KEGG_PATHWAY	Central carbon metabolism in cancer	9	RT	9	459	69	8998	1.1	0.023	2.6	1	0.13	0.11	0.008
KEGG_PATHWAY	Neomycin, kanamycin and gentamicin biosynthesis	3	RT	3	459	5	8998	0.4	0.023	11.8	1	0.13	0.11	0.0012
KEGG_PATHWAY	Lipid and atherosclerosis	19	RT	19	459	216	8998	2.3	0.027	1.7	1	0.14	0.12	0.014
KEGG_PATHWAY	Human papillomavirus infection	28	RT	28	459	362	8998	3.4	0.029	1.5	1	0.15	0.13	0.018
KEGG_PATHWAY	Staphylococcus aureus infection	13	RT	13	459	128	8998	1.6	0.03	2	1	0.15	0.13	0.013
KEGG_PATHWAY	Primary immunodeficiency	6	RT	6	459	36	8998	0.7	0.034	3.3	1	0.17	0.14	0.009
KEGG_PATHWAY	Fructose and mannose metabolism	6	RT	6	459	36	8998	0.7	0.034	3.3	1	0.17	0.14	0.009
KEGG_PATHWAY	Legionellosis	8	RT	8	459	61	8998	1	0.034	2.6	1	0.17	0.14	0.012
KEGG_PATHWAY	T cell receptor signaling pathway	11	RT	11	459	103	8998	1.3	0.036	2.1	1	0.17	0.15	0.016
KEGG_PATHWAY	Endocytosis	22	RT	22	459	272	8998	2.7	0.037	1.6	1	0.17	0.15	0.021
KEGG_PATHWAY	Fatty acid metabolism	8	RT	8	459	62	8998	1	0.037	2.5	1	0.17	0.15	0.013
KEGG_PATHWAY	Glycosphingolipid biosynthesis - ganglio series	4	RT	4	459	15	8998	0.5	0.038	5.2	1	0.17	0.15	0.0058
KEGG_PATHWAY	Allograft rejection	8	RT	8	459	63	8998	1	0.04	2.5	1	0.18	0.15	0.014
KEGG_PATHWAY	Graft-versus-host disease	8	RT	8	459	63	8998	1	0.04	2.5	1	0.18	0.15	0.014
KEGG_PATHWAY	Biosynthesis of nucleotide sugars	6	RT	6	459	38	8998	0.7	0.042	3.1	1	0.18	0.15	0.012
KEGG_PATHWAY	Oxidative phosphorylation	13	RT	13	459	135	8998	1.6	0.042	1.9	1	0.18	0.15	0.02
KEGG_PATHWAY	Hematopoietic cell lineage	10	RT	10	459	94	8998	1.2	0.049	2.1	1	0.21	0.18	0.021
KEGG_PATHWAY	Various types of N-glycan biosynthesis	6	RT	6	459	40	8998	0.7	0.051	2.9	1	0.22	0.18	0.015
KEGG_PATHWAY	Type I diabetes mellitus	8	RT	8	459	70	8998	1	0.064	2.2	1	0.27	0.22	0.025
KEGG_PATHWAY	Kaposi sarcoma-associated herpesvirus infection	18	RT	18	459	224	8998	2.2	0.064	1.6	1	0.27	0.22	0.037
KEGG_PATHWAY	Peroxisome	9	RT	9	459	86	8998	1.1	0.071	2.1	1	0.29	0.24	0.031
KEGG_PATHWAY	Hepatitis B	14	RT	14	459	163	8998	1.7	0.072	1.7	1	0.29	0.24	0.039
KEGG_PATHWAY	VEGF signaling pathway	7	RT	7	459	58	8998	0.8	0.073	2.4	1	0.29	0.24	0.027
KEGG_PATHWAY	PD-L1 expression and PD-1 checkpoint pathway in cancer	9	RT	9	459	88	8998	1.1	0.079	2	1	0.31	0.26	0.035
KEGG_PATHWAY	Biosynthesis of unsaturated fatty acids	5	RT	5	459	34	8998	0.6	0.092	2.9	1	0.36	0.3	0.028
KEGG_PATHWAY	Regulation of actin cytoskeleton	17	RT	17	459	220	8998	2.1	0.095	1.5	1	0.36	0.31	0.057
KEGG_PATHWAY	Pertussis	8	RT	8	459	77	8998	1	0.096	2	1	0.36	0.31	0.042

## Sheet: Down-KEGG
Category	Term	RT	Count	LT	PH	PT	%	P-Value	Fold Enrichment	Bonferroni	Benjamini	FDR	Fisher Exact
KEGG_PATHWAY	Pancreatic secretion	RT	18	59	114	8998	18.9	2e-19	24.1	2e-17	2e-17	1.9e-17	7.3e-21
KEGG_PATHWAY	Protein digestion and absorption	RT	11	59	108	8998	11.6	1.3e-09	15.5	1.3e-07	6.3e-08	6e-08	7.7e-11
KEGG_PATHWAY	Fat digestion and absorption	RT	7	59	43	8998	7.4	2.8e-07	24.8	2.7e-05	8.9e-06	8.5e-06	9.7e-09
KEGG_PATHWAY	Glycine, serine and threonine metabolism	RT	6	59	40	8998	6.3	5.2e-06	22.9	0.0005	0.00012	0.00012	2e-07
KEGG_PATHWAY	Metabolic pathways	RT	26	59	1620	8998	27.4	7.7e-06	2.4	0.00074	0.00015	0.00014	3.1e-06
KEGG_PATHWAY	Biosynthesis of amino acids	RT	7	59	79	8998	7.4	1.1e-05	13.5	0.001	0.00017	0.00016	7.3e-07
KEGG_PATHWAY	Glycerolipid metabolism	RT	4	59	63	8998	4.2	0.0077	9.7	0.52	0.11	0.1	0.00074
KEGG_PATHWAY	Folate biosynthesis	RT	3	59	26	8998	3.2	0.012	17.6	0.69	0.14	0.14	0.00063
KEGG_PATHWAY	Influenza A	RT	5	59	173	8998	5.3	0.025	4.4	0.91	0.27	0.25	0.0054
KEGG_PATHWAY	Carbon metabolism	RT	4	59	121	8998	4.2	0.043	5	0.99	0.41	0.39	0.008
KEGG_PATHWAY	Cysteine and methionine metabolism	RT	3	59	54	8998	3.2	0.047	8.5	0.99	0.41	0.39	0.0052
